# Supplementary material for: Insights into the Antibacterial Activity of Prolactin-Inducible Protein against the Standard and Environmental MDR Bacterial Strains
Source: MDPI journal article supplement (doi:10.3390/microorganisms10030597), 2022-03-09
Supplement: s1 [file s1]

**>H30195-U9324CI260-2-T7ter**

[illegible]

### Fig.S1: Sequence of PIP gene
